# Supplementary material
Source: HighWire-hosted journal article supplement (https://cmaj.ca/highwire/filestream/57869/field_highwire_adjunct_files/1/meta-ley-appendix_2.pdf)
Supplement: meta-ley-appendix_2.pdf [file meta-ley-appendix_2.pdf]

**Appendix 2:** Comparing associations of IGT with and NCEP- or IDF-defined metabolic syndrome with incident type 2 diabetes after adjustment for age and sex

| Variable                               | OR (95% CI)      | <i>p</i> value | C statistic | <i>p</i> value (v. IGT) |
|----------------------------------------|------------------|----------------|-------------|-------------------------|
| IGT                                    | 2.87 (1.52–5.40) | 0.001          | 0.681       | –                       |
| NCEP ATP III original definition       | 2.03 (1.10–3.75) | 0.024          | 0.668       | 0.57                    |
| NCEP definition using FPG ≥ 5.6 mmol/L | 2.19 (1.27–3.77) | 0.005          | 0.678       | 0.93                    |
| IDF definition*                        | 2.14 (1.29–3.55) | 0.003          | 0.682       | 0.96                    |

Note: CI = confidence interval; FPG = fasting plasma glucose; IDF = International Diabetes Federation; IGT = impaired glucose tolerance; NCEP ATP III = National Cholesterol Education Program Adult Treatment Panel III; OR = odds ratio.  
\*Age-specific cutoffs used.
